# Supplementary material
Source: MDPI journal article supplement (https://www.mdpi.com/1999-4907/13/7/1143)
Supplement: s1 [file s1]

# Supplemental Material

## (Re)Designing Urban Parks to Maximize Urban Heat Island Mitigation by Natural Means

Victor L. Barradas <sup>1,\*</sup>, Jennifer A. Miranda <sup>2</sup>, Manuel Esperón-Rodríguez <sup>3</sup> and Monica Ballinas <sup>2</sup>

<sup>1</sup> Laboratorio Interacción Planta-Atmósfera, Instituto de Ecología, Universidad Nacional Autónoma de México, Mexico City, 04510, Mexico

<sup>2</sup> Departamento de Arquitectura del Paisaje, Facultad de Arquitectura, Universidad Nacional Autónoma de México, Mexico City 04510, Mexico; arquicosmos.77@gmail.com

<sup>3</sup> Hawkesbury Institute for the Environment, Western Sydney University, Richmond, NSW , Australia;

m.esperon-rodriguez@westernsydney.edu.au

<sup>4</sup> Laboratorio de Entornos Sostenibles, Facultad de Arquitectura, Universidad Nacional Autónoma de México, Mexico City 04510, Mexico

\* Correspondence: vlbarradas@ecologia.unam.mx (V.L.B.)

**Supplemental Table S1.** Mean values of mean annual temperature (MAT, °C), annual precipitation (AP, mm), maximum temperature of the warmest month (MTWM, °C), and precipitation of the driest quarter (PDQ, mm) for 15 dominant urban tree species based on their realized climatic niches.

| Species                        | MAT  | MTWM | AP     | PDQ   |
|--------------------------------|------|------|--------|-------|
| <i>Acacia longifolia</i>       | 16.2 | 24.5 | 937.7  | 119.9 |
| <i>Acer negundo</i>            | 8.7  | 26.3 | 714.6  | 116.3 |
| <i>Alnus acuminata</i>         | 13.3 | 18.5 | 1166.7 | 120.5 |
| <i>Buddleja cordata</i>        | 15.3 | 24.0 | 866.7  | 30.5  |
| <i>Celtis occidentalis</i>     | 10.5 | 28.0 | 945.2  | 163.5 |
| <i>Ficus benjamina</i>         | 23.9 | 32.0 | 1410.6 | 106.4 |
| <i>Fraxinus uhdei</i>          | 17.4 | 25.9 | 862.6  | 61.7  |
| <i>Lagerstroemia indica</i>    | 20.1 | 31.4 | 1354.3 | 154.1 |
| <i>Ligustrum lucidum</i>       | 18.5 | 31.5 | 950.5  | 157.5 |
| <i>Liquidambar styraciflua</i> | 15.7 | 29.7 | 1204.1 | 217.3 |
| <i>Populus alba</i>            | 10.3 | 24.6 | 755.2  | 126.9 |
| <i>Populus deltoides</i>       | 13.3 | 30.3 | 845.9  | 139.3 |
| <i>Quercus rugosa</i>          | 13.8 | 24.2 | 893.3  | 35.4  |
| <i>Robinia pseudoacacia</i>    | 10.7 | 25.5 | 915.9  | 173.6 |
| <i>Ulmus parvifolia</i>        | 17.4 | 30.5 | 1104.0 | 153.8 |

**Supplemental Table S2.** Results of linear regression models used to assess relationships between two physiological traits (transpiration =  $E$ ; stomatal conductance =  $g_s$ ) and four climate variables (mean annual temperature = MAT; annual precipitation = AP; maximum temperature of the warmest month = MTWM; precipitation of the driest quarter = PDQ) of 15 dominant tree species.

| Trait | Variable | R <sup>2</sup> | Intercept | Slope                 | F-value | p-value |
|-------|----------|----------------|-----------|-----------------------|---------|---------|
| $E$   | MAT      | -0.03          | 0.01      | 0.005                 | 0.57    | 0.46    |
|       | MTWM     | -0.07          | 0.02      | 0.0009                | 0.014   | 0.91    |
|       | AP       | 0.014          | 0.006     | 0.001                 | 1.199   | 0.29    |
|       | PDQ      | -0.07          | 0.02      | $9.08 \times 10^{-6}$ | 0.026   | 0.87    |
| $g_s$ | MAT      | -0.08          | 2.5       | -0.003                | 0.004   | 0.95    |
|       | MTWM     | -0.06          | 3.25      | -0.03                 | 0.23    | 0.64    |
|       | AP       | -0.05          | 1.8       | 0.0006                | 0.32    | 0.58    |
|       | PDQ      | -0.07          | 2.24      | 0.002                 | 0.12    | 0.75    |
